# Supplementary material
Source: HighWire-hosted journal article supplement (https://openheart.bmj.com/content/6/1/e000840)
Supplement: inline-supplementary-material-1 [file inline-supplementary-material-1.docx]

**Supplemental Table1. Study definition of abnormal echocardiographic parameters in the Copenhagen Heart Failure Risk Study.**

|  | **Echocardiographic parameters and values:** |
| --- | --- |
| **Abnormal systolic function** | Simpson’s biplane LVEF:  Female ≤ 53 %  Male ≤ 51 % |
| **LV enlargement** | LVEDV indexed to body surface area:  Female > 61 ml/m2  Male > 74 ml/m2 |
| **LV hypertrophy** | LV mass indexed to body surface area:  Female >96 g/m2  Male >116 g/m2 |
| **Abnormal diastolic function** | e’ septal:  Female < 4.1 cm/s  Male < 4.3 cm/s  Lateral E/e′ ratio > 13 or Septal E/e′ > 15 |
| **Left atrial enlargement** | Left atrial volume indexed to body surface:  ≥35 ml/m2 |
| **Global Longitudinal Strain** | Study definition of abnormal GLS:  Female > -15.3 %  Male > -14.7 % |
| **Significant valve disease** | Moderate-severe Aortic Stenosis – aortic valve area < 1cm2  Moderate-severe Aortic Regurgitation - visual judgment  Severe Mitral Stenosis - PG mean > 12mmHg |

Abbreviations: LVEF = Left ventricle ejection fraction; LV = left ventricle; LVEDV = left ventricle end-diastolic diameter volume; e’= myocardial peak early velocity; E = peak velocity of early mitral inflow; GLS = global longitudinal strain.
